# Supplementary material
Source: PubMed Central journal article supplement (PMC7870647)

(a) Surface pressure (Pa)

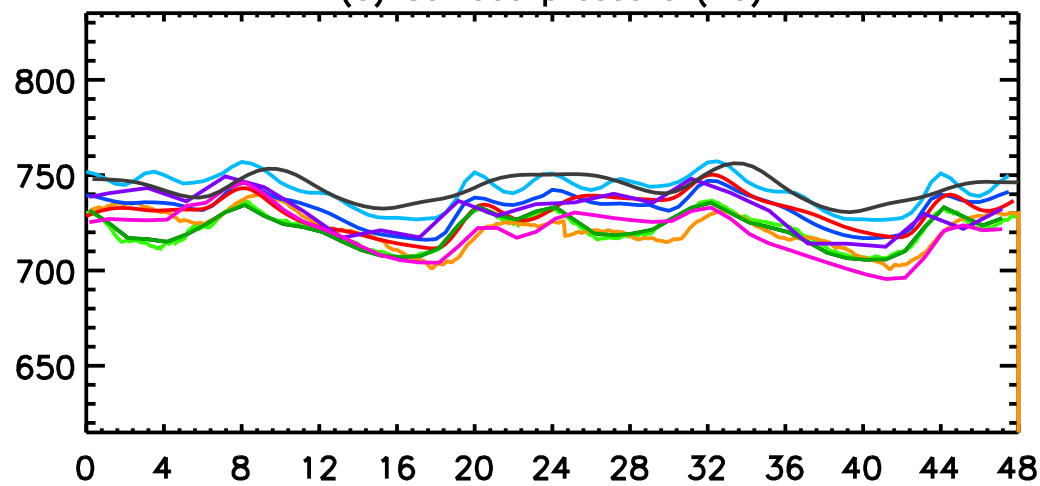

(b) Surface pressure (%)

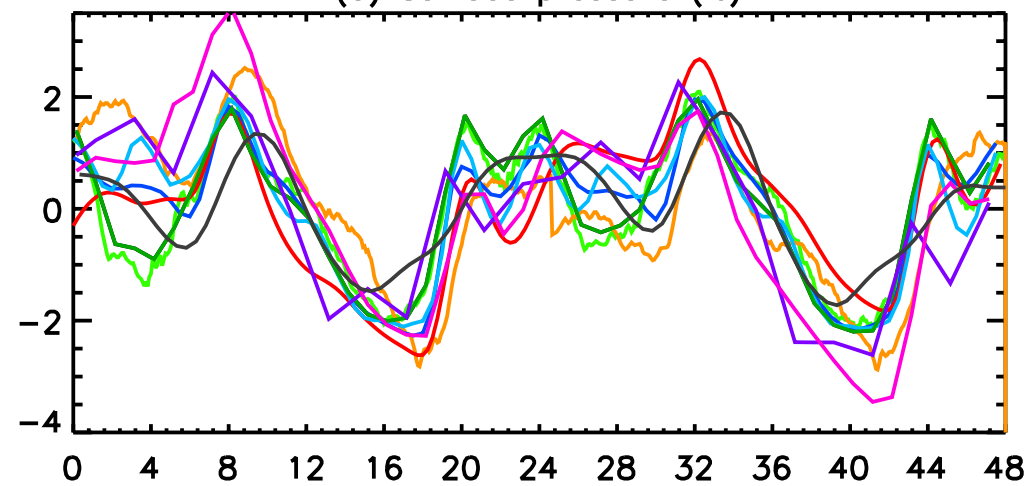

(c) Surface temperature (K)

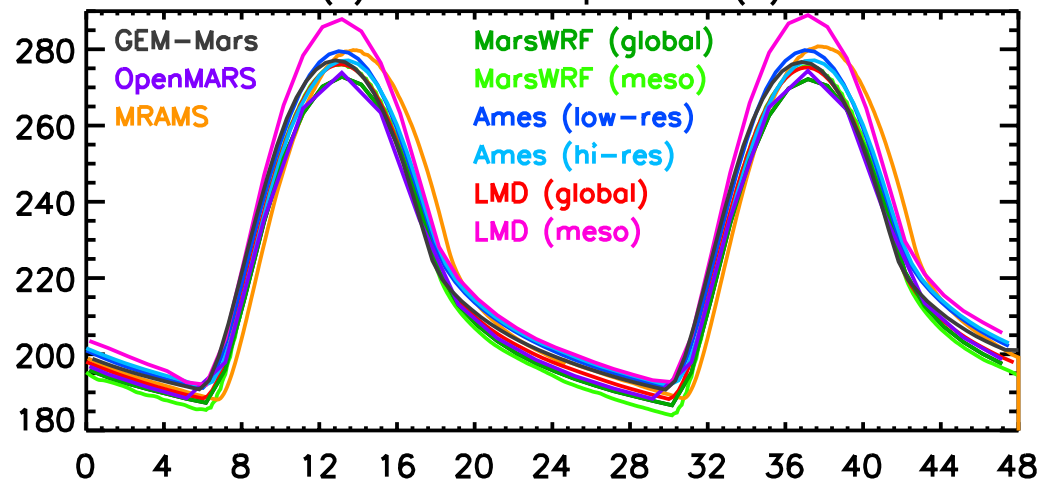

(d) Atmospheric temperature (K)

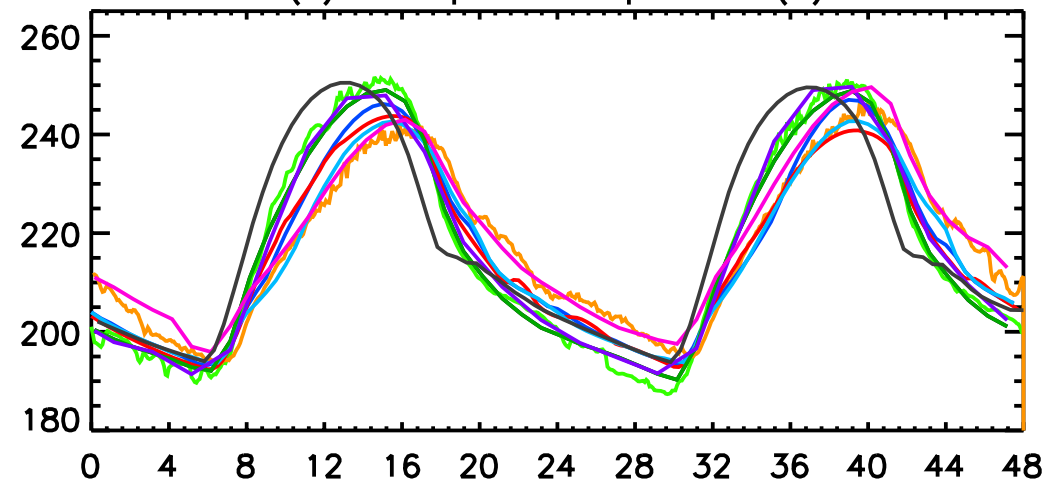

(e) Wind magnitude (m/s)

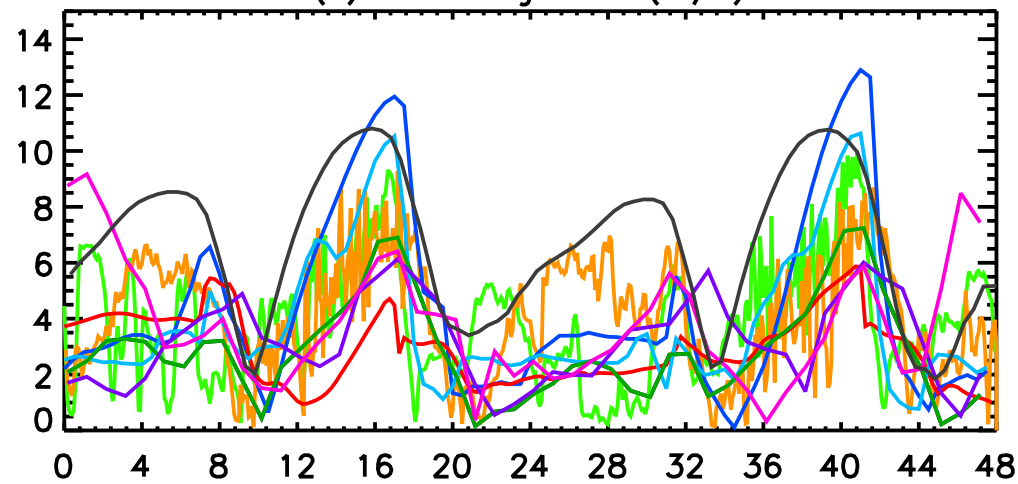

(f) Direction wind is from (deg)

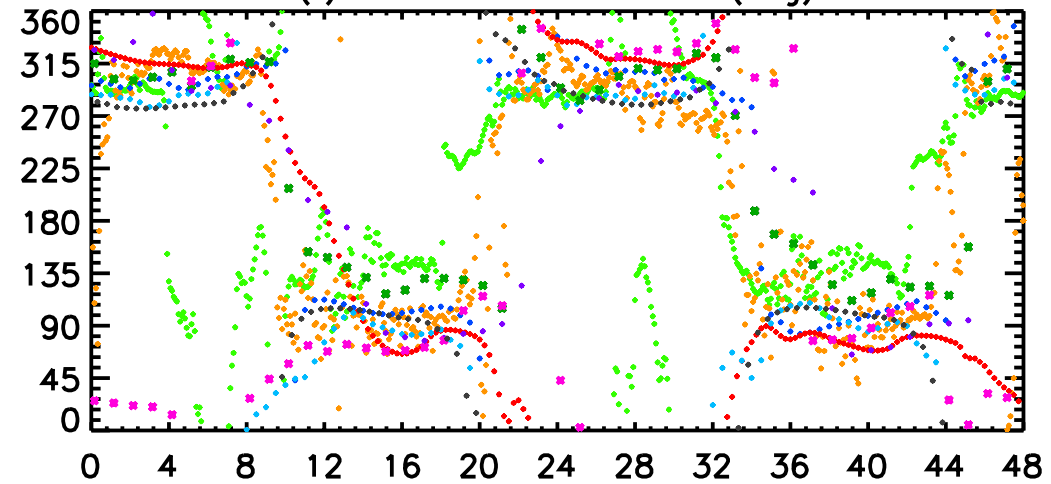

(g) Atmospheric density (kg/m3)

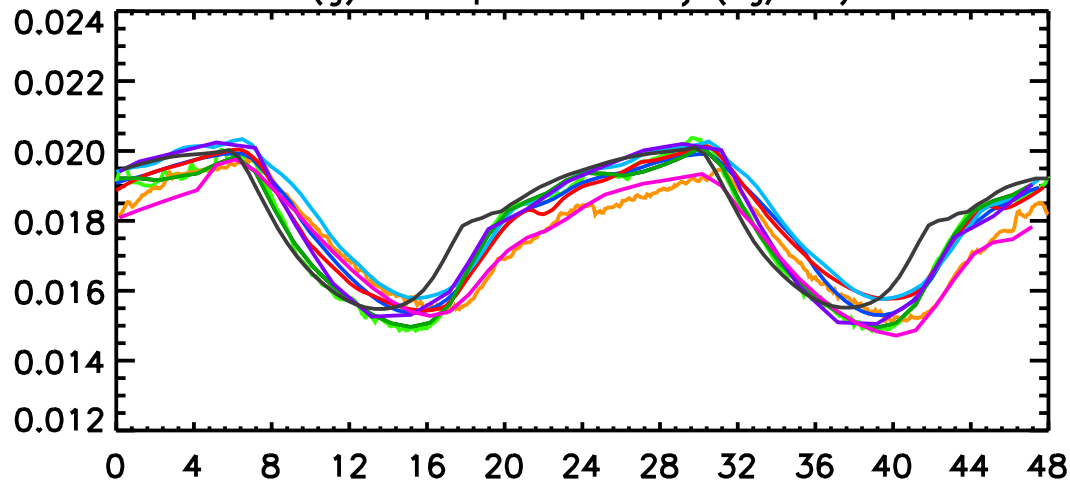

(h) Wind stress (Pa)

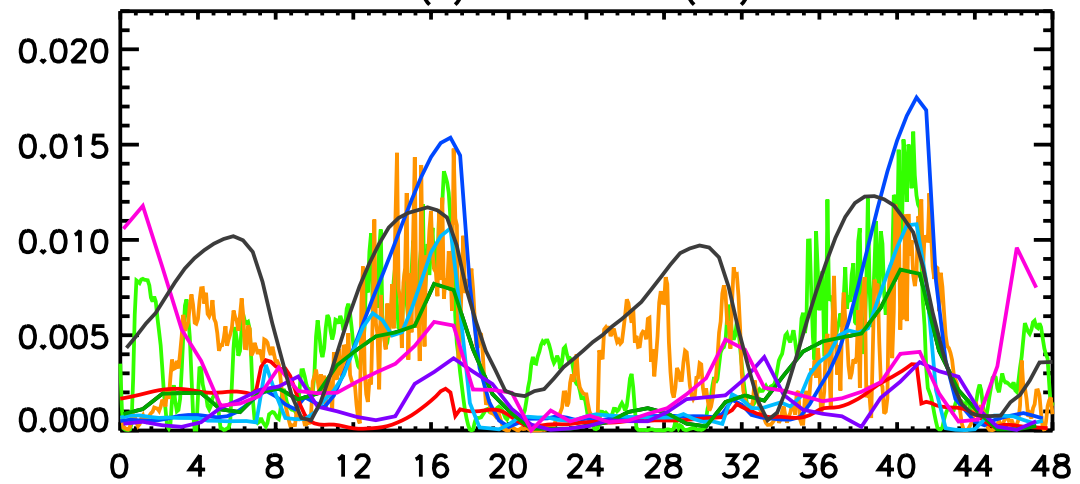

Supplement: 11214_2020_788_MOESM9_ESM.pdf [file 11214_2020_788_MOESM9_ESM.pdf]
